# Supplementary material
Source: PubMed Central journal article supplement (PMC3292292)
Supplement: cr2011196x1.pdf [file cr2011196x1.pdf]

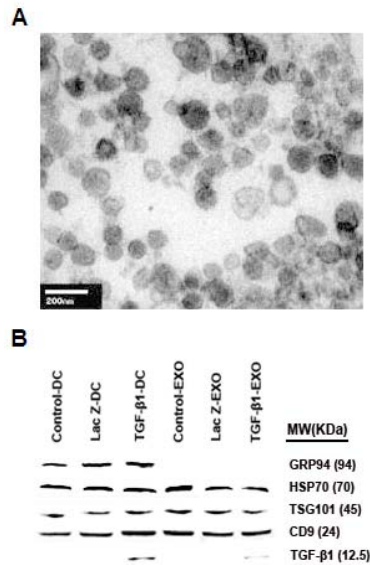

**Supplementary information, Figure S1** Characterization of the exosomes from BMDCs. **(A)** Electron microscopy analysis of exosomes from murine BMDCs. Bar = 200 nm. **(B)** Western blot analysis of exosomes associated proteins. Data are representative of three independent experiments.
