# Supplementary material
Source: PubMed Central journal article supplement (PMC3292292)
Supplement: cr2011196x2.pdf [file cr2011196x2.pdf]

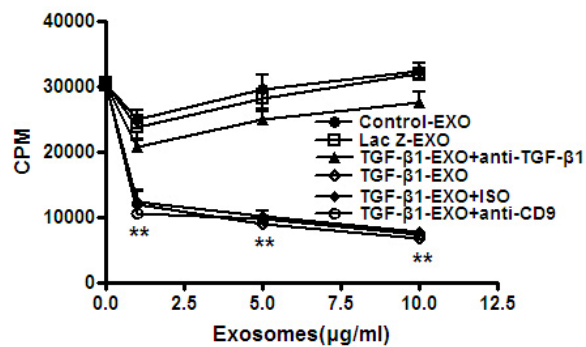

**Supplementary information, Figure S2** The serial concentrations of exosomes were added into culture of T cells isolated from BALB/c spleen and Control DCs from C57BL/6 at 10:1 ratio. In TGF-β1 blocking assay, TGF-β1-EXO was co-incubated with 1µg/ml TGF-β1 neutralized antibodies (anti-TGF-β1), 1µg/ml anti-CD9 antibodies (anti-CD9) or 1µg/ml isotype antibodies (ISO). T cell proliferation was determined by [<sup>3</sup>H]-Thymidine incorporation after 114h of culture. \*\*P<0.01, versus Control-EXO and Lac Z-EXO (n=3). Data are representative of three independent experiments.
