# Supplementary material
Source: PubMed Central journal article supplement (PMC3292292)
Supplement: cr2011196x3.pdf [file cr2011196x3.pdf]

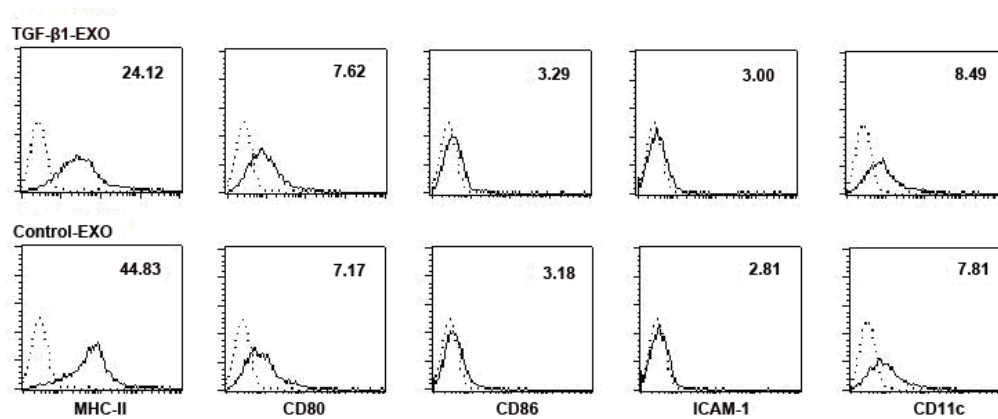

**Supplementary information, Figure S3**, FACS analysis of bead-coated exosomes. Exosomes were coated on beads, stained with isotype (broken line) or PE-labeled anti-MHC-II, CD80, CD86, ICAM-1 and CD11c (real line) monoclonal antibody, washed, and analyzed on a FACSCalibur. Numbers indicated mean fluorescent intensity. Data are representative of three independent experiments.
