# Supplementary material
Source: PubMed Central journal article supplement (PMC3292292)
Supplement: cr2011196x4.pdf [file cr2011196x4.pdf]

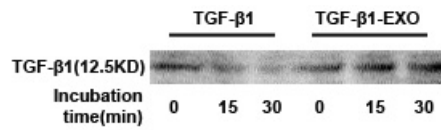

**Supplementary information, Figure S4** TGF-β1 in exosomes resists the hydrolysis of proteases. 6ng TGF-β1 cytokine and 40μg TGF-β1-EXO containing the same amount of TGF-β1 were digested by trypsin at 37 °C with concentration of 25μg/ml for 15 and 30 min. After trypsin digestion, the samples were subjected to Western blot analysis. Data are representative of three independent experiments.
