# Supplementary material
Source: PubMed Central journal article supplement (PMC3292292)
Supplement: cr2011196x5.pdf [file cr2011196x5.pdf]

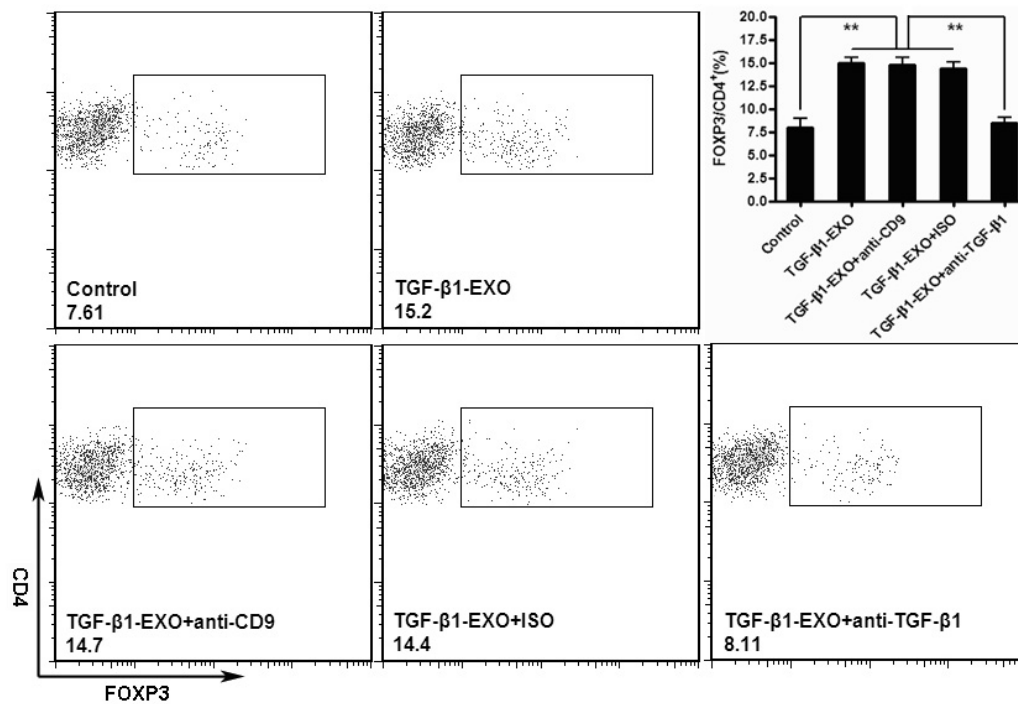

**Supplementary information, Figure S5** TGF-β1-EXO can increase the relative numbers of CD4<sup>+</sup>Foxp3<sup>+</sup> Treg via TGF-β1 in vitro.  $1 \times 10^6$ /ml splenocytes were cocultured with 10 μg/ml TGF-β1-EXO, TGF-β1-EXO plus 1 μg/ml TGF-β1 neutralized antibodies or 1 μg/ml anti-CD9 antibodies in the presence of 0.5 μg/ml of anti-CD3 and 1 μg/ml of anti-CD28 for 48 h. CD4<sup>+</sup>Foxp3<sup>+</sup> Tregs were analyzed by FACS. \*\*P < 0.01 (n=3). Data are representative of three independent experiments.
