# Supplementary material
Source: PubMed Central journal article supplement (PMC3292292)
Supplement: cr2011196x6.pdf [file cr2011196x6.pdf]

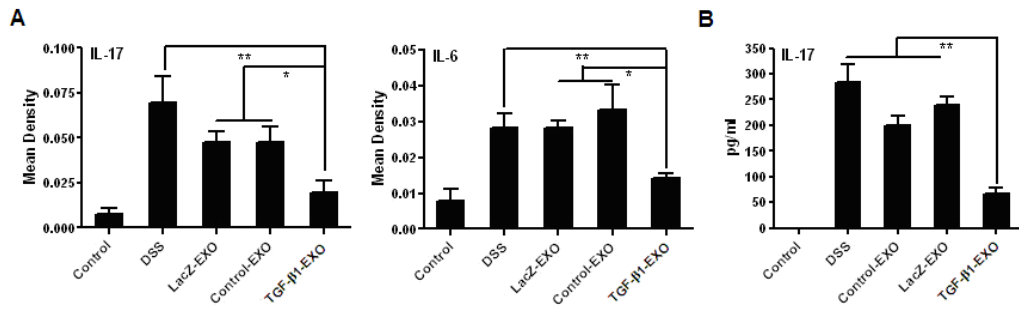

**Supplementary information, Figure S6** TGF- $\beta$ 1-EXO inhibit Th17 in murine colon tissues and sera. **(A)** Level of IL-17 and IL-6 in murine colon tissues. **(B)** Level of IL-17 in murine sera. \* $P < 0.05$ , \*\* $P < 0.01$  ( $n = 3$ ). Data are representative of three independent experiments.
